# Supplementary material for: Microemulsions as reaction media for the synthesis of Pt nanoparticles
Source: Royal Society of Chemistry journal article supplement (doi:10.1039/c0cp01085e), 2010-09-30
Supplement: c0cp01085e.pdf [file c0cp01085e.pdf]

Supplementary Material

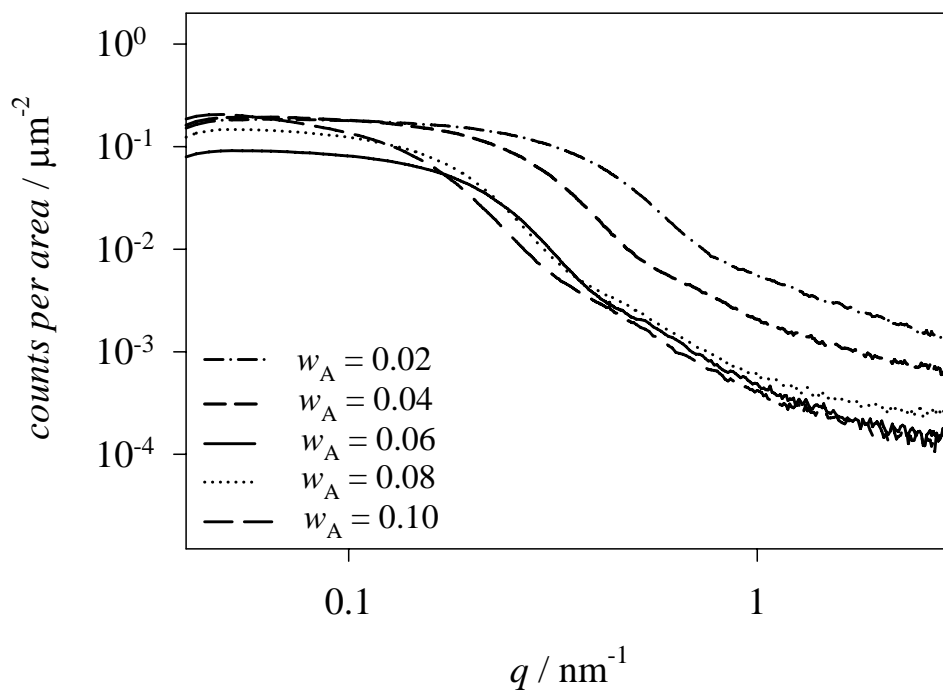

**Figure S1:** Normalized small-angle X-ray scattering (SAXS) curves of the w/o-microemulsion containing 160 mM of  $\text{NaBH}_4$  at  $w_A = 0.02, 0.04, 0.06, 0.08$  and  $0.10$ .

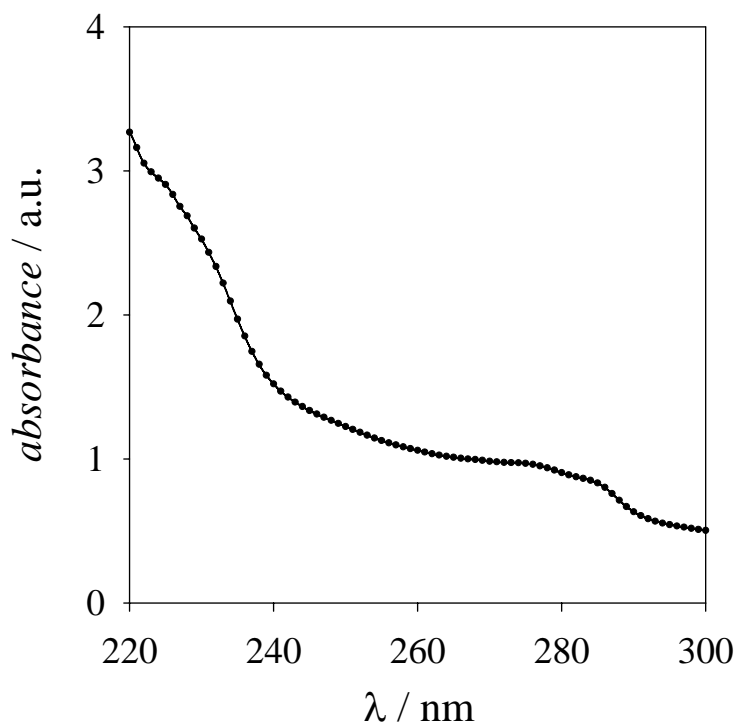

**Figure S2:** (a) UV-Vis spectra of the sample 1g. The absence of any peak at 260 nm proves the absence of  $\text{PtCl}_6^{2-}$  ions. The shoulder at 280 nm is given by an impurity in the Brij30 stock solution.

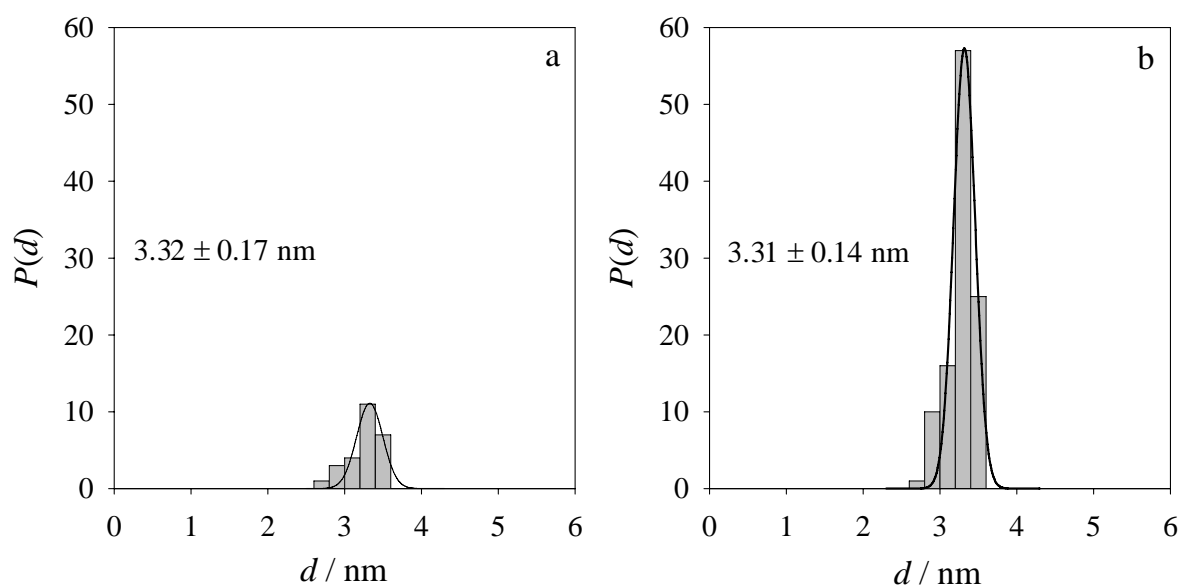

**Figure S3:** Simulated particle size distribution  $P(d)$  for the systems: (a)  $n_{\text{react}}(\text{H}_2\text{PtCl}_6) = 6$ ,  $n_{\text{react}}(\text{NaBH}_4) = 50$ ,  $f = 1400$ ; (b)  $n_{\text{react}}(\text{H}_2\text{PtCl}_6) = 26$ ,  $n_{\text{react}}(\text{NaBH}_4) = 208$ ,  $f = 1400$ . The mean particle size and the error obtained from fitting the data with a Gaussian distribution are also given.

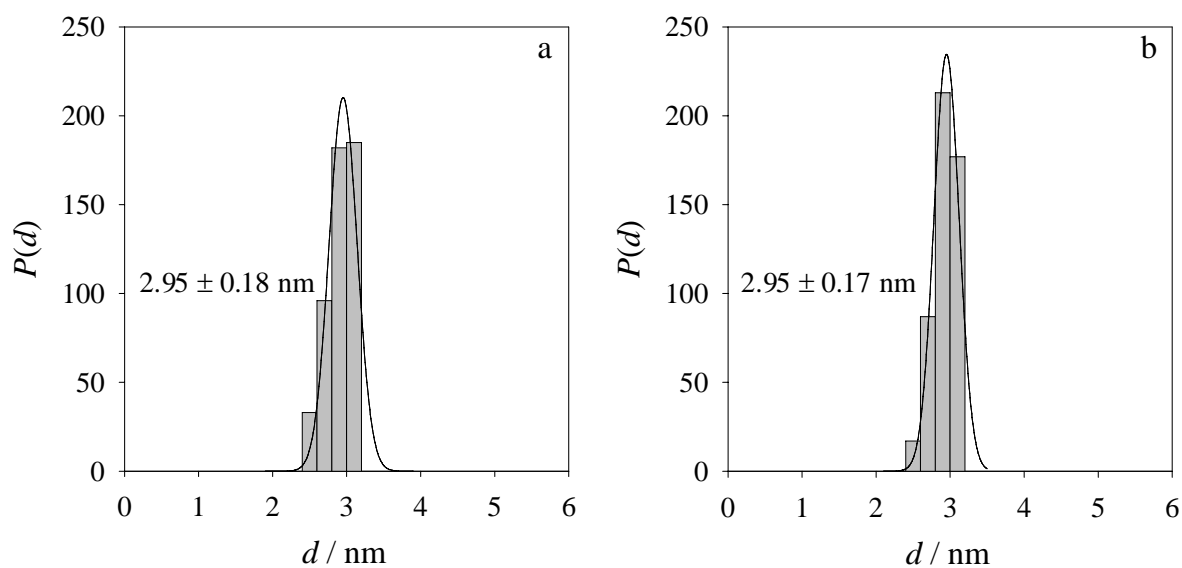

**Figure S4:** Simulated particle size distribution  $P(d)$  for the systems: (a)  $n_{\text{react}}(\text{H}_2\text{PtCl}_6) = 83$ ,  $n_{\text{react}}(\text{NaBH}_4) = 467$ ,  $k_{\text{ex}}(\text{H}_2\text{PtCl}_6) = 0.5$ ,  $k_{\text{ex}}(\text{NaBH}_4) = 0.5$ ,  $v_r = 0.5$ ,  $f = 1000$ ; (b)  $n_{\text{react}}(\text{H}_2\text{PtCl}_6) = 83$ ,  $n_{\text{react}}(\text{NaBH}_4) = 467$ ,  $k_{\text{ex}}(\text{H}_2\text{PtCl}_6) = 1.0$ ,  $k_{\text{ex}}(\text{NaBH}_4) = 1.0$ ,  $v_r = 1.0$ ,  $f = 1000$ . The mean particle size and the error obtained from fitting the data with a Gaussian distribution are also given.

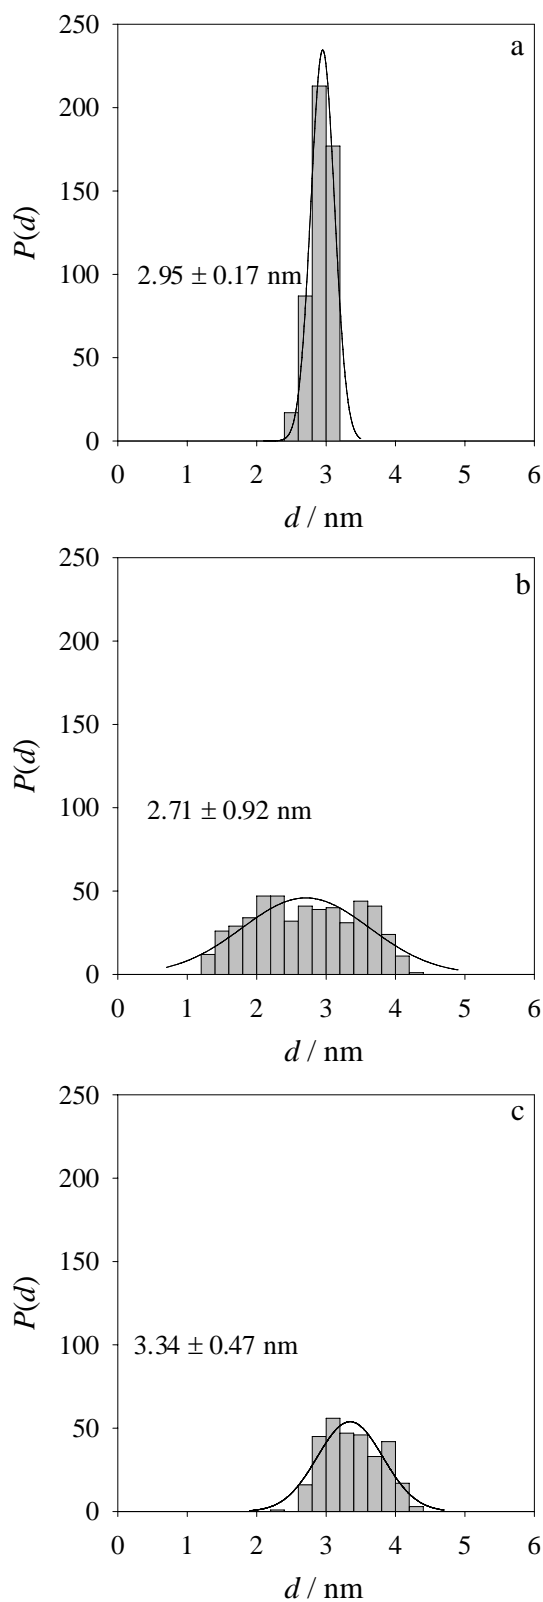

**Figure S5:** Simulated particle size distribution  $P(d)$  for the systems with  $n_{\text{react}}(\text{H}_2\text{PtCl}_6) = 83$ ,  $n_{\text{react}}(\text{NaBH}_4) = 467$  and (a)  $f = 100$ ,  $w_{\text{ncrit}} = 1.0$  (growth via Ostwald ripening); (b)  $f = 1$ ,  $w_{\text{ncrit}} = 0.001$  (growth exclusively via autocatalysis); (c)  $f = 1000$ ,  $w_{\text{ncrit}} = 0.001$  (both growth mechanism involved). The mean particle size and the error obtained from fitting the data with a Gaussian distribution are also given.
